# Supplementary material
Source: Springer Nature journal article supplement (https://www.springermedizin.de/resource/supplementary/12913_2009_1138_MOESM3_ESM.pdf/9527662)

**Number of patients**

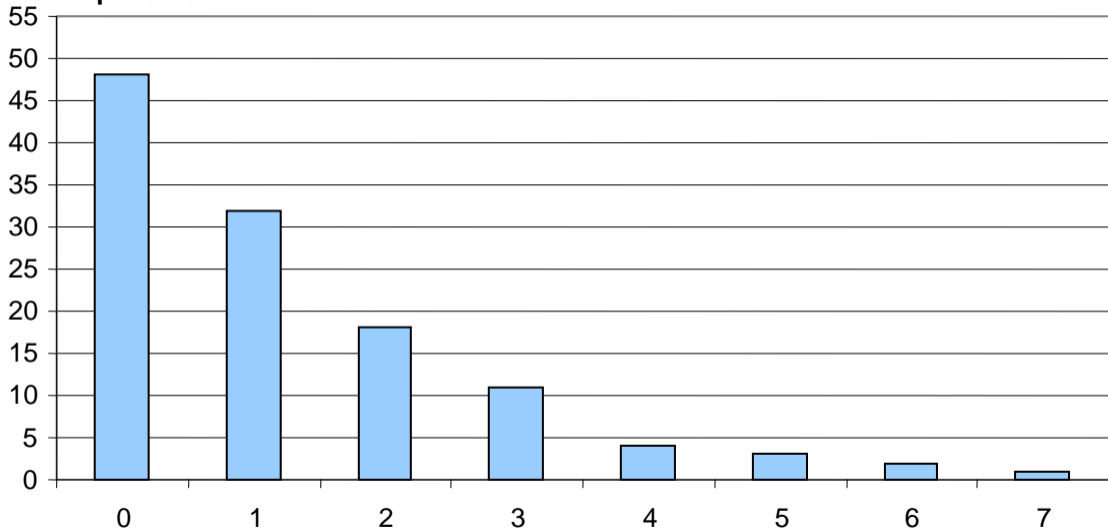

**Number of incidents**

Supplement: MOESM3 [file 9527662]
